# Supplementary material
Source: PubMed Central journal article supplement (PMC9951105)
Supplement: jamaneurol-e230033-s003.pdf [file jamaneurol-e230033-s003.pdf]

## Data Sharing Statement

Boyne. Optimal Intensity and Duration of Walking Rehabilitation in Patients With Chronic Stroke. *JAMA Neurol.* Published February 23, 2023. doi:10.1001/jamaneurol.2023.0033

### Data

**Data available:** Yes

**Data types:** Deidentified participant data, Data dictionary

**How to access data:** <https://dash.nichd.nih.gov/>

**When available:** With publication

### Supporting Documents

**Document types:** None

### Additional Information

**Who can access the data:** researchers whose proposed use of the data has been approved by the repository

**Types of analyses:** for a specified purpose

**Mechanisms of data availability:** with signed data access agreement and approval of the repository
